# Supplementary material for: Expansion of mutation-driven haematopoietic clones is associated with insulin resistance and low HDL-cholesterol in individuals with obesity
Source: bioRxiv or medRxiv preprint supplement (doi:10.1101/2021.05.12.443095), 2021-07-09

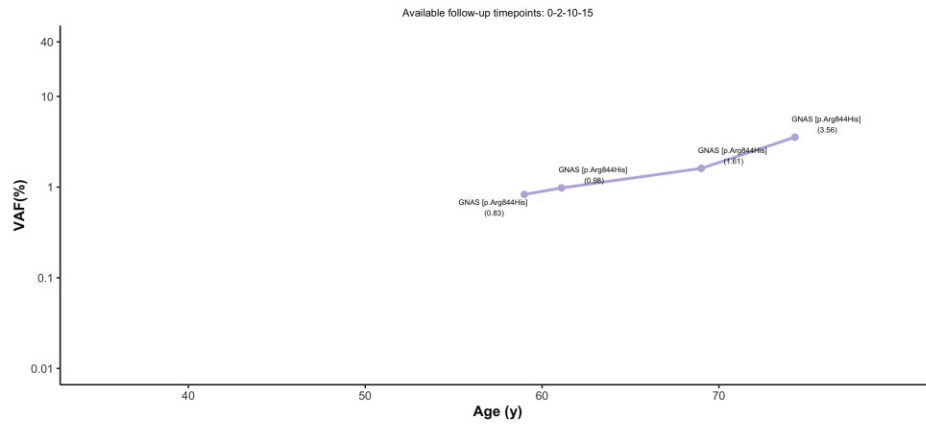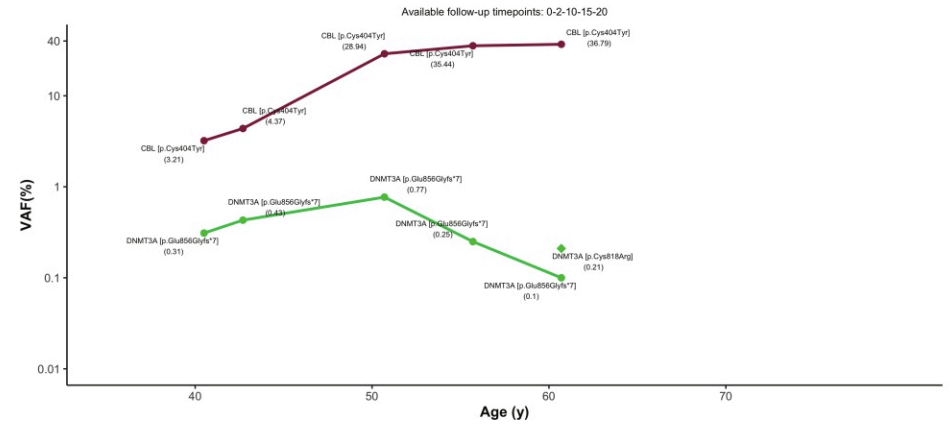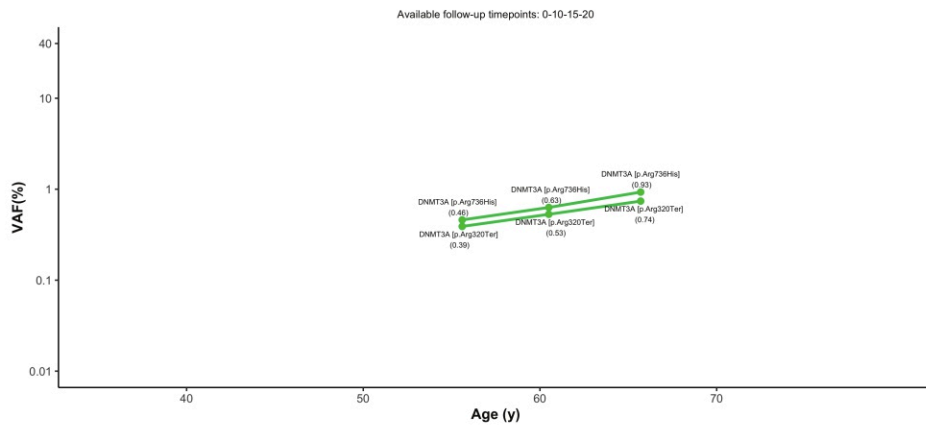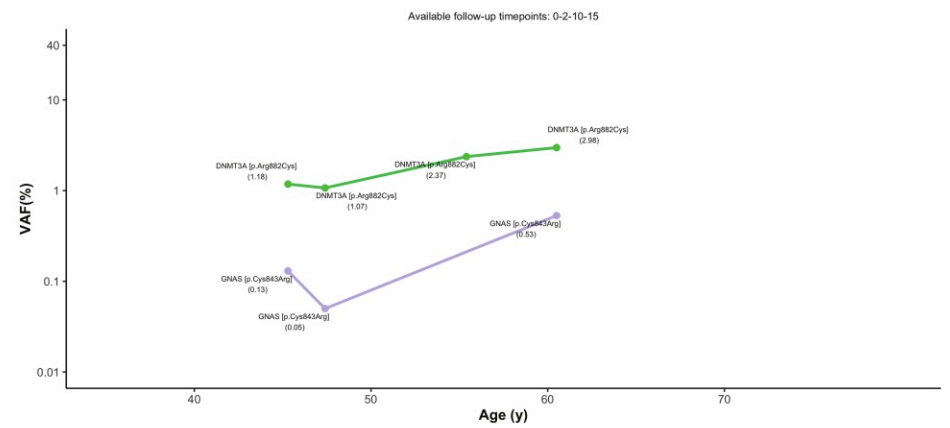

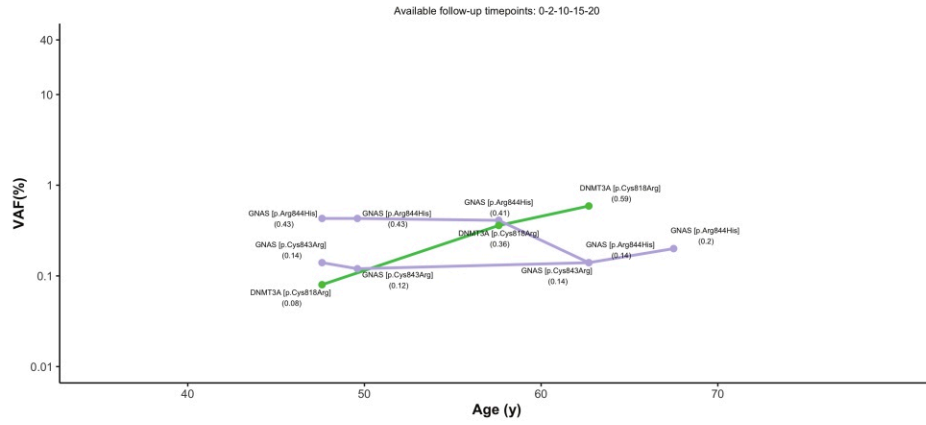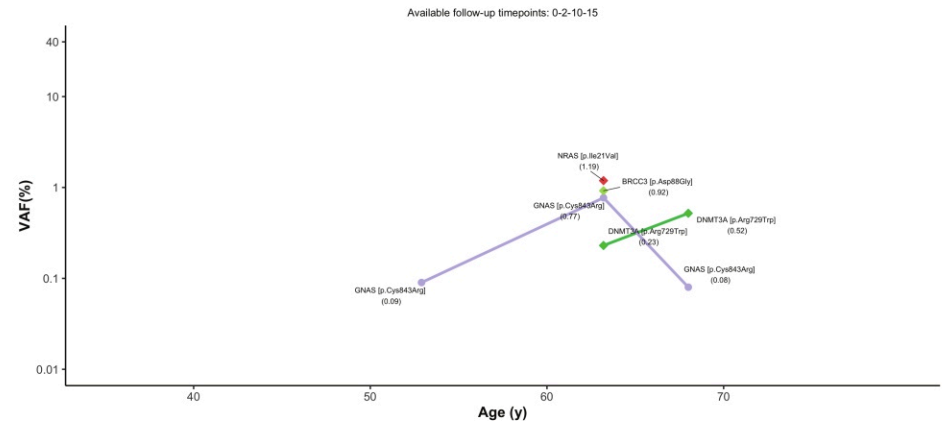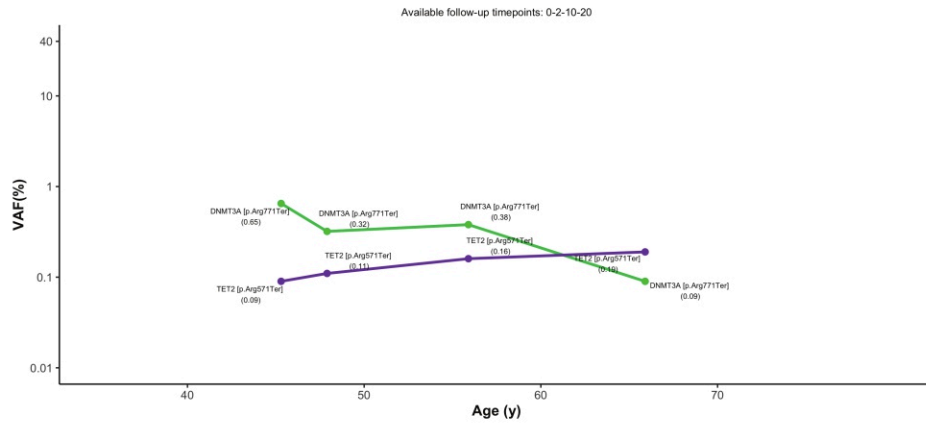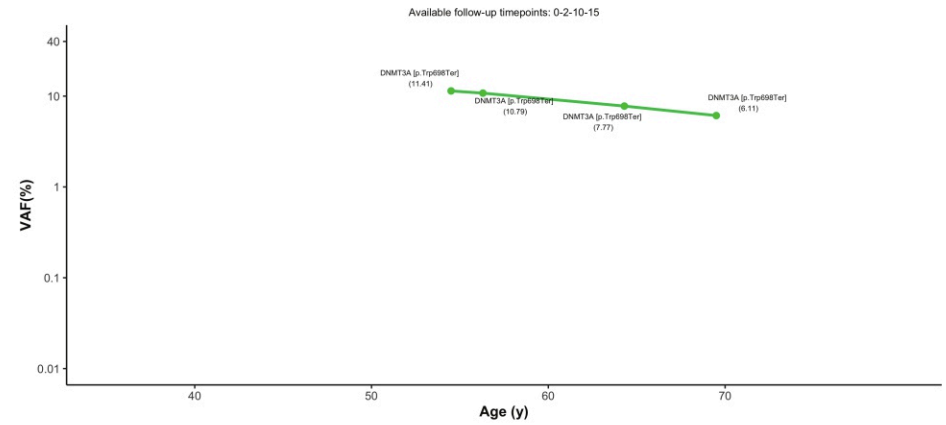









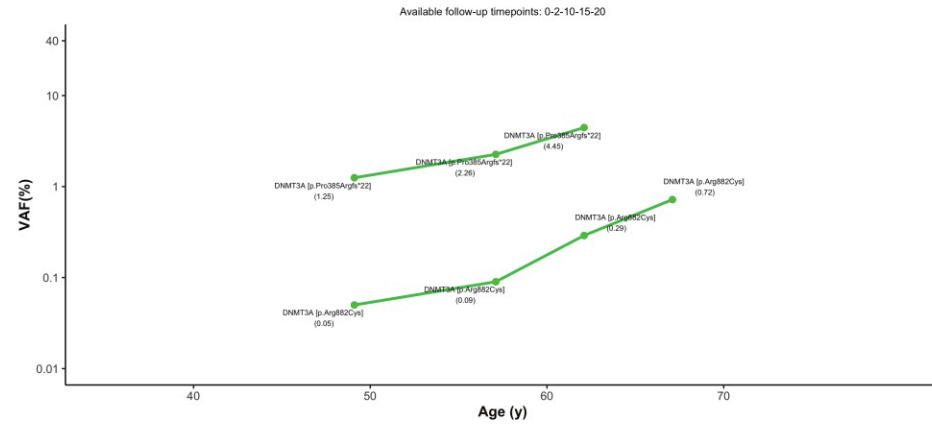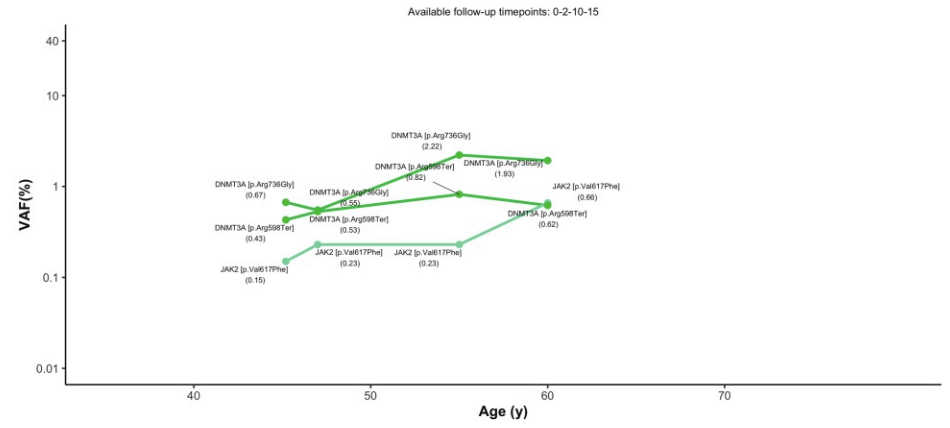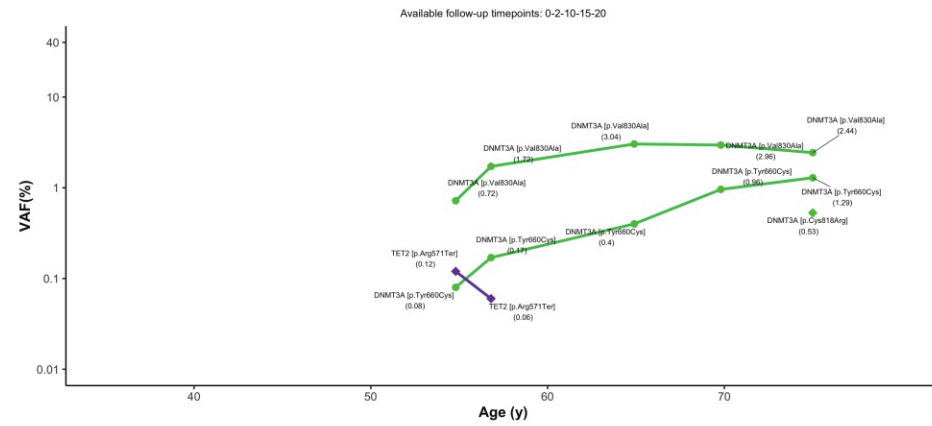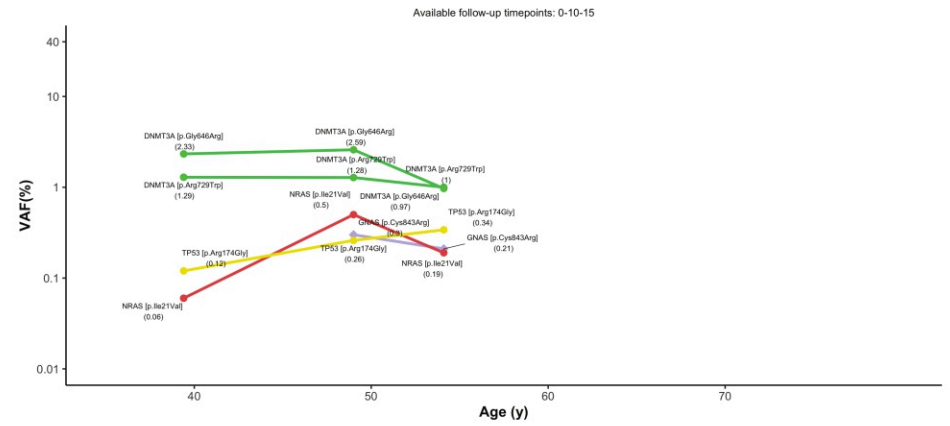

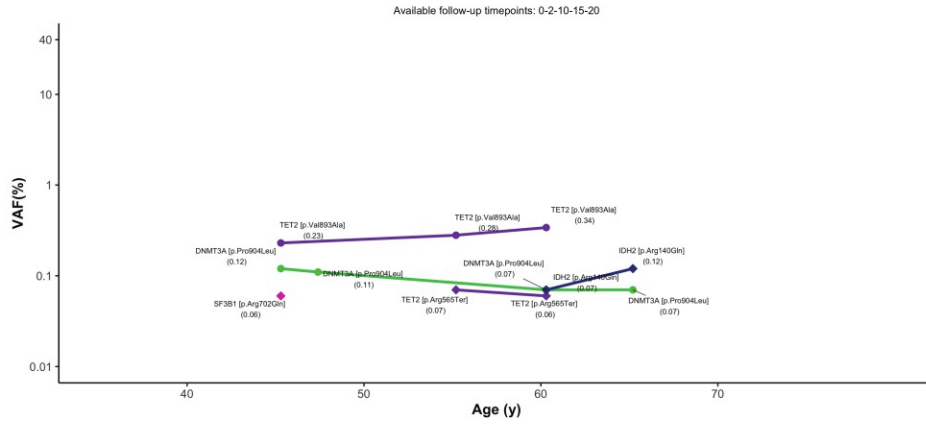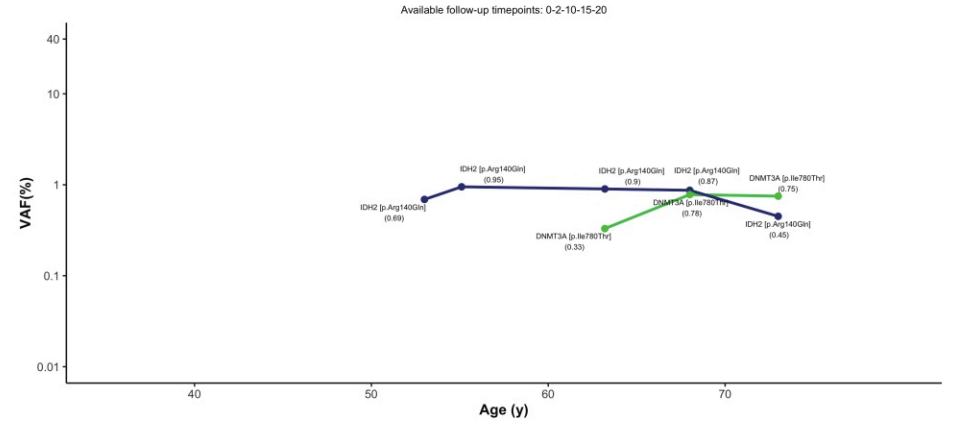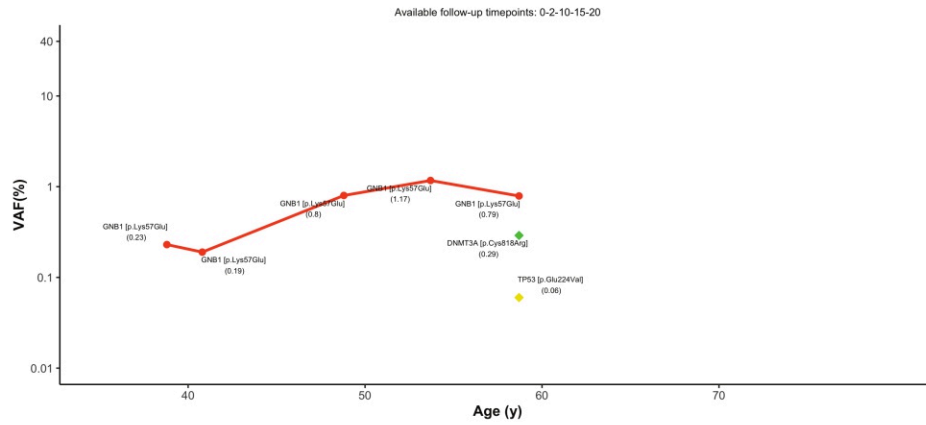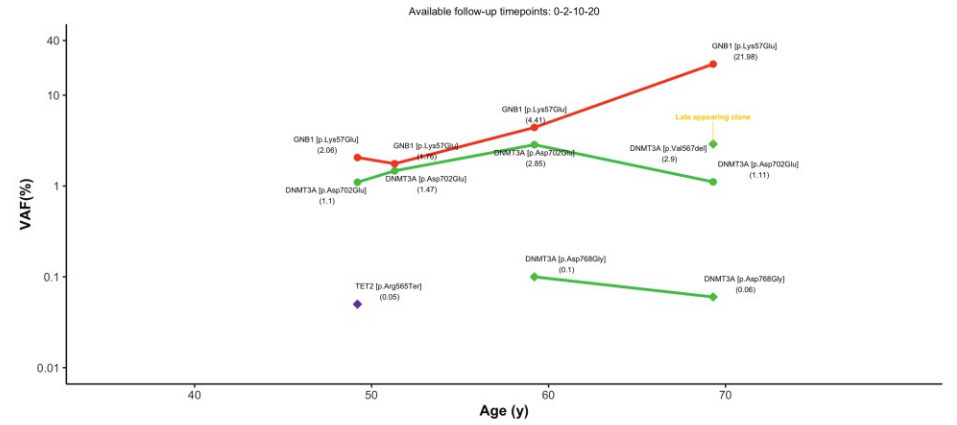

Supplement: Supplementary file [file media-6.pdf]
