# Supplementary material for: Expansion of mutation-driven haematopoietic clones is associated with insulin resistance and low HDL-cholesterol in individuals with obesity
Source: bioRxiv or medRxiv preprint supplement (doi:10.1101/2021.05.12.443095), 2021-07-09
Supplement: Supplementary file [file media-4.pdf]

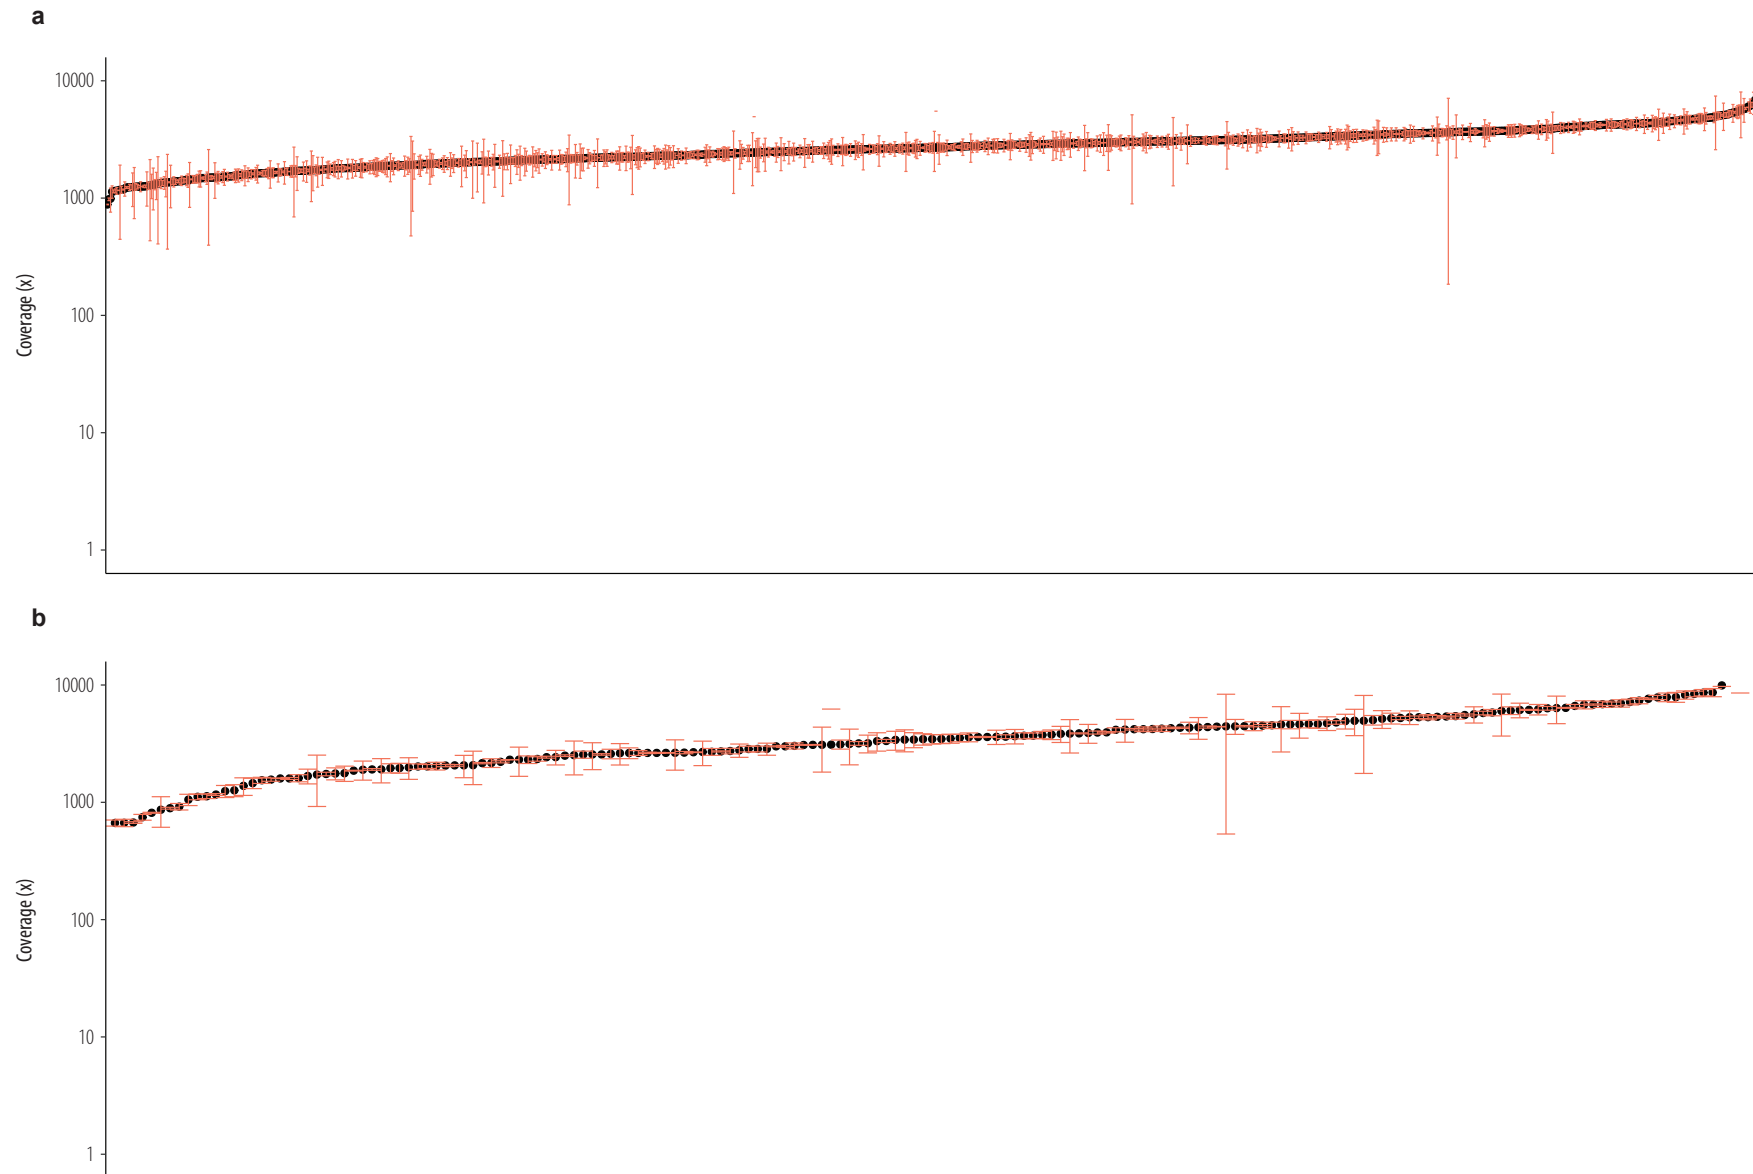

**File S4. smMIP coverage of single- and multiple-timepoint datasets. (a)** Average smMIP coverage over the entire CH-panel for both technical replicates per individual in the single-timepoint dataset (N=1050). **(b)** Average smMIP coverage over the entire CH-panel for both technical replicates per DNA sample in the multiple-timepoint dataset (N DNA samples=180). In both **(a)** and **(b)** the error bars represent the standard deviation.
