# Supplementary material for: Expansion of mutation-driven haematopoietic clones is associated with insulin resistance and low HDL-cholesterol in individuals with obesity
Source: bioRxiv or medRxiv preprint supplement (doi:10.1101/2021.05.12.443095), 2021-07-09
Supplement: Supplementary file [file media-7.pdf]

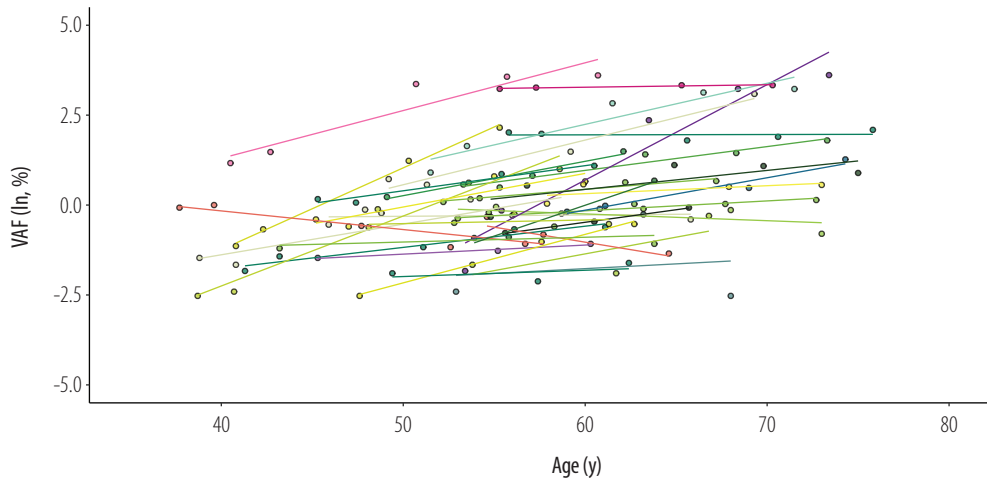

**File S7. Slope inspection of 32 selected trajectories in multiple-timepoint dataset.** A linear regression line as computed by `geom_smooth()` is shown for each selected trajectory.
